# Supplementary material for: Ground-based Tropospheric Ozone Measurements: Regional tropospheric ozone column trends from the TOAR-II/ HEGIFTOM homogenized datasets
Source: Copernicus journal article supplement (doi:10.5194/egusphere-2024-3745), 2025-01-13
Supplement: Supplementary file 1 [file egusphere-2024-3745-supplement.pdf]

**Table S1. Overview of the individual HEGITOM sites that are included in the LMM synthesized trend estimation for each region. The instrument type, site/airport name or code, latitude, longitude, begin and end year of the time series since 1990 and the total number of observations during this time period are shown.**

| Region     | Instrument | Name             | lat   | lon     | begin | end  | N <sub>obs</sub> |
|------------|------------|------------------|-------|---------|-------|------|------------------|
| Europe     | O3S        | Madrid           | 40.47 | -3.58   | 1994  | 2022 | 1179             |
| Europe     | O3S        | L'Aquila         | 42.30 | 13.31   | 1994  | 2023 | 354              |
| Europe     | Lidar      | OHPO3T           | 43.94 | 5.71    | 2000  | 2022 | 1592             |
| Europe     | O3S        | OHPO3T           | 43.94 | 5.71    | 1991  | 2023 | 1494             |
| Europe     | Umk        | 40               | 43.94 | 5.71    | 1985  | 2022 | 6037             |
| Europe     | O3S        | Payerne          | 46.49 | 6.57    | 2002  | 2022 | 3112             |
| Europe     | FTIR       | Jungfraujoch     | 46.55 | 7.98    | 2000  | 2023 | 8649             |
| Europe     | Umk        | 35               | 46.78 | 9.68    | 1979  | 2022 | 4731             |
| Europe     | FTIR       | Zugspitze        | 47.42 | 10.98   | 1995  | 2022 | 20113            |
| Europe     | O3S        | Hohenpeissenberg | 47.80 | 11.01   | 1966  | 2023 | 6438             |
| Europe     | IAGOS      | VIE              | 48.12 | 16.56   | 1995  | 2021 | 3929             |
| Europe     | IAGOS      | MUC              | 48.35 | 11.79   | 1996  | 2011 | 1995             |
| Europe     | IAGOS      | CDG              | 49.00 | 2.57    | 1994  | 2022 | 4661             |
| Europe     | IAGOS      | FRA              | 50.05 | 8.57    | 1994  | 2022 | 18457            |
| Europe     | O3S        | Uccle            | 50.80 | 4.35    | 1969  | 2022 | 6717             |
| Europe     | IAGOS      | BRU              | 50.90 | 4.48    | 1997  | 2009 | 2121             |
| Europe     | IAGOS      | LGW              | 51.16 | -0.16   | 2005  | 2009 | 378              |
| Europe     | IAGOS      | DUS              | 51.28 | 6.77    | 1995  | 2015 | 984              |
| Europe     | O3S        | Valentia         | 51.94 | -10.25  | 1994  | 2022 | 767              |
| Europe     | O3S        | De Bilt          | 52.10 | 5.18    | 1992  | 2020 | 1487             |
| Europe     | O3S        | Legionowo        | 52.40 | 20.97   | 1993  | 2022 | 1744             |
| Europe     | FTIR       | Bremen           | 53.10 | 8.85    | 2004  | 2023 | 1994             |
| Eur Arctic | O3S        | Lerwick          | 60.13 | -1.18   | 1992  | 2022 | 1631             |
| Eur Arctic | FTIR       | Harestua         | 60.20 | 10.80   | 2009  | 2020 | 2366             |
| Eur Arctic | O3S        | Sodankylä        | 67.37 | 26.65   | 1994  | 2022 | 1434             |
| Eur Arctic | FTIR       | Kiruna           | 67.84 | 20.40   | 1996  | 2022 | 5461             |
| Eur Arctic | O3S        | Scoresbysund     | 70.48 | -21.97  | 1989  | 2022 | 1587             |
| Eur Arctic | FTIR       | Ny Ålesund       | 78.92 | 11.92   | 1994  | 2022 | 2457             |
| Eur Arctic | O3S        | Ny Ålesund       | 78.92 | 11.93   | 1992  | 2022 | 2632             |
| Can Arctic | O3S        | Resolute         | 74.70 | -94.96  | 1966  | 2021 | 2182             |
| Can Arctic | FTIR       | Thule            | 76.53 | -68.74  | 1999  | 2022 | 6210             |
| Can Arctic | O3S        | Eureka           | 79.98 | -85.94  | 1992  | 2021 | 1870             |
| Can Arctic | FTIR       | Eureka           | 80.05 | -86.42  | 2006  | 2020 | 6261             |
| Can Arctic | O3S        | Alert            | 82.49 | -62.34  | 1987  | 2020 | 1587             |
| California | IAGOS      | LAX              | 33.94 | -118.41 | 1995  | 2018 | 270              |
| California | Lidar      | TMF              | 34.38 | -117.68 | 2000  | 2023 | 2918             |
| California | IAGOS      | SFO              | 37.62 | -122.39 | 1994  | 2018 | 331              |
| W USA      | IAGOS      | LAX              | 33.94 | -118.41 | 1995  | 2018 | 270              |
| W USA      | Lidar      | TMF              | 34.38 | -117.68 | 2000  | 2023 | 2918             |
| W USA      | IAGOS      | SFO              | 37.62 | -122.39 | 1994  | 2018 | 331              |
| W USA      | Umk        | 67               | 39.99 | -105.26 | 1979  | 2022 | 7093             |

|             |       |                |       |         |      |      |      |
|-------------|-------|----------------|-------|---------|------|------|------|
| W USA       | O3S   | Boulder        | 40.00 | -105.25 | 1967 | 2023 | 2037 |
| W USA       | FTIR  | Boulder        | 40.04 | -105.24 | 2010 | 2022 | 3613 |
| Pacific NW  | IAGOS | PDX            | 45.59 | -122.59 | 2003 | 2018 | 380  |
| Pacific NW  | IAGOS | YVR            | 49.19 | -123.18 | 1995 | 2021 | 596  |
| Pacific NW  | O3S   | Kelowna        | 49.93 | -119.40 | 2003 | 2017 | 699  |
| Pacific NW  | O3S   | Port Hardy     | 50.68 | -127.38 | 2018 | 2021 | 109  |
| Pacific NW  | O3S   | Edmonton       | 53.54 | -114.10 | 1970 | 2021 | 2169 |
| E N America | O3S   | Wallops Island | 37.93 | -75.48  | 1995 | 2020 | 1474 |
| E N America | IAGOS | IAD            | 38.95 | -77.45  | 1994 | 2022 | 689  |
| E N America | IAGOS | PHL            | 39.88 | -75.24  | 1999 | 2022 | 713  |
| E N America | IAGOS | JFK            | 40.64 | -73.79  | 1994 | 2022 | 2222 |
| E N America | IAGOS | EWR            | 40.69 | -74.18  | 1994 | 2021 | 1151 |
| E N America | IAGOS | ORD            | 41.98 | -87.90  | 1994 | 2021 | 1343 |
| E N America | IAGOS | DTW            | 42.21 | -83.36  | 1999 | 2022 | 454  |
| E N America | IAGOS | BOS            | 42.37 | -71.02  | 1994 | 2022 | 1137 |
| E N America | FTIR  | Toronto        | 43.60 | -79.36  | 2002 | 2023 | 5497 |
| E N America | IAGOS | YYZ            | 43.68 | -79.61  | 1994 | 2021 | 870  |
| E N America | O3S   | Yarmouth       | 43.87 | -66.11  | 2003 | 2021 | 793  |
| E N America | IAGOS | YUL            | 45.46 | -73.75  | 1999 | 2021 | 276  |
| E N America | O3S   | Goose Bay      | 53.31 | -60.36  | 1969 | 2021 | 2351 |
| SE US       | IAGOS | IAH            | 29.98 | -95.34  | 1994 | 2022 | 570  |
| SE US       | IAGOS | DAL            | 32.84 | -96.85  | 1995 | 2022 | 1263 |
| SE US       | IAGOS | ATL            | 33.64 | -84.44  | 1994 | 2022 | 1948 |
| East China  | IAGOS | PVG            | 31.15 | 121.80  | 2000 | 2021 | 182  |
| East China  | IAGOS | SHA            | 31.20 | 121.34  | 1997 | 2000 | 200  |
| East China  | IAGOS | NKG            | 31.74 | 118.87  | 2009 | 2020 | 69   |
| East China  | FTIR  | Hefei          | 31.91 | 117.17  | 2015 | 2020 | 3375 |
| S Japan     | IAGOS | KIX            | 34.44 | 135.24  | 1994 | 2018 | 1209 |
| S Japan     | IAGOS | NGO            | 34.86 | 136.81  | 2006 | 2020 | 413  |
| S Japan     | IAGOS | NKM            | 35.25 | 136.92  | 1997 | 2004 | 86   |
| S Japan     | IAGOS | NRT            | 35.77 | 140.39  | 1995 | 2018 | 1170 |
| S Japan     | FTIR  | Tsukuba        | 36.05 | 140.12  | 2014 | 2020 | 780  |
| NE Asia     | IAGOS | TAO            | 36.27 | 120.38  | 2012 | 2022 | 127  |
| NE Asia     | IAGOS | ICN            | 37.45 | 126.45  | 2001 | 2022 | 171  |
| NE Asia     | IAGOS | GMP            | 37.56 | 126.80  | 1994 | 2000 | 260  |
| NE Asia     | IAGOS | PEK            | 40.08 | 116.59  | 1995 | 2021 | 766  |
| NE Asia     | IAGOS | SHE            | 41.86 | 123.43  | 2012 | 2021 | 219  |
| NE Asia     | FTIR  | Rikubetsu      | 43.46 | 143.77  | 1995 | 2022 | 2670 |
| NE Asia     | FTIR  | Moshiri        | 44.40 | 142.30  | 1996 | 2007 | 1473 |
| SE Asia     | IAGOS | SGN            | 10.81 | 106.66  | 1994 | 2018 | 239  |
| SE Asia     | IAGOS | BKK            | 13.69 | 100.75  | 2006 | 2022 | 272  |
| SE Asia     | IAGOS | DMK            | 13.91 | 100.61  | 1994 | 2006 | 748  |
| S China Sea | O3S   | Hanoi          | 21.01 | 105.80  | 2004 | 2021 | 350  |
| S China Sea | IAGOS | HAN            | 21.21 | 105.80  | 1994 | 2018 | 117  |
| S China Sea | IAGOS | HKG            | 22.32 | 113.94  | 1999 | 2021 | 728  |

|                   |       |              |        |         |      |      |       |
|-------------------|-------|--------------|--------|---------|------|------|-------|
| S China Sea       | IAGOS | CAN          | 23.39  | 113.30  | 2005 | 2018 | 94    |
| S China Sea       | IAGOS | TPE          | 25.08  | 121.22  | 2012 | 2018 | 1422  |
| S Malay Peninsula | IAGOS | SIN          | 1.36   | 103.99  | 1995 | 2022 | 170   |
| S Malay Peninsula | O3S   | Kuala Lumpur | 2.73   | 101.27  | 1998 | 2022 | 498   |
| S Malay Peninsula | IAGOS | KUL          | 2.76   | 101.71  | 1998 | 2016 | 87    |
| India             | IAGOS | MAA          | 12.98  | 80.16   | 1994 | 2018 | 460   |
| India             | IAGOS | HYD          | 17.24  | 78.43   | 2005 | 2018 | 485   |
| Persian Gulf      | IAGOS | JED          | 21.67  | 39.15   | 1999 | 2019 | 240   |
| Persian Gulf      | IAGOS | AUH          | 24.43  | 54.65   | 1999 | 2017 | 67    |
| Persian Gulf      | IAGOS | RUH          | 24.96  | 46.70   | 1999 | 2022 | 288   |
| Persian Gulf      | IAGOS | DXB          | 25.25  | 55.35   | 1997 | 2022 | 538   |
| Persian Gulf      | IAGOS | DOH          | 25.27  | 51.56   | 2012 | 2017 | 131   |
| Persian Gulf      | IAGOS | BAH          | 26.27  | 50.63   | 2010 | 2021 | 14    |
| Persian Gulf      | IAGOS | DMM          | 26.47  | 49.80   | 2003 | 2022 | 68    |
| Persian Gulf      | IAGOS | KWI          | 29.24  | 47.97   | 2001 | 2022 | 417   |
| Gulf of Guinea    | IAGOS | SSG          | 3.76   | 8.72    | 2014 | 2022 | 126   |
| Gulf of Guinea    | IAGOS | DLA          | 4.01   | 9.72    | 1997 | 2022 | 141   |
| Gulf of Guinea    | IAGOS | PHC          | 5.01   | 6.95    | 2002 | 2022 | 79    |
| Gulf of Guinea    | IAGOS | ABJ          | 5.25   | -3.93   | 1997 | 2022 | 187   |
| Gulf of Guinea    | IAGOS | ACC          | 5.61   | -0.17   | 2003 | 2022 | 45    |
| Gulf of Guinea    | IAGOS | LFW          | 6.17   | 1.25    | 1997 | 2022 | 63    |
| Gulf of Guinea    | IAGOS | COO          | 6.35   | 2.39    | 2001 | 2022 | 68    |
| Gulf of Guinea    | IAGOS | LOS          | 6.58   | 3.32    | 1997 | 2022 | 494   |
| Gulf of Guinea    | IAGOS | ABV          | 9.00   | 7.27    | 2003 | 2022 | 247   |
| Hawaii            | O3S   | Hilo         | 19.43  | -155.04 | 1982 | 2023 | 1829  |
| Hawaii            | FTIR  | Mauna Loa    | 19.54  | -155.57 | 1995 | 2022 | 10226 |
| Hawaii            | Umk   | 31           | 19.54  | -155.58 | 1985 | 2022 | 11971 |
| Oceania           | FTIR  | Lauder       | -45.04 | 169.68  | 2001 | 2023 | 10389 |
| Oceania           | Umk   | 256          | -45.04 | 169.68  | 1987 | 2022 | 4233  |
| Oceania           | O3S   | Lauder       | -45.00 | 169.68  | 1986 | 2021 | 1810  |
| Oceania           | FTIR  | Wollongong   | -34.41 | 150.88  | 2007 | 2023 | 8481  |

**Table S2: Synthesized TrOC trend estimates, 2-sigma uncertainties, p-values, and trend confidence for the different regions for 1995-2019 (columns (1) to (3)), and for 2000-2019 (columns (4) to (6)). Following the TOAR-II statistical guidelines (Chang et al., 2023) the following degrees of certainty is assigned to a trend according to p value: very high certainty ( $p \leq 0.01$ ), high certainty ( $0.05 \geq p > 0.01$ ), medium certainty ( $0.10 \geq p > 0.05$ ), low certainty ( $0.33 \geq p > 0.10$ ), and very low certainty or no evidence ( $p > 0.33$ ). Combining these uncertainty levels with the data coverage assignments in Table 2 gives the calibrated language for discussing confidence in long-term trend estimates as in Gaudel et al. (2024), and included here in columns (3) and (6).**

|                   | (1)                              | (2)     | (3)        | (4)                              | (5)     | (6)        |
|-------------------|----------------------------------|---------|------------|----------------------------------|---------|------------|
|                   | 1995-2019                        |         |            | 2000-2019                        |         |            |
|                   | Trend $\pm 2\sigma$<br>[ppb/dec] | p-value | confidence | Trend $\pm 2\sigma$<br>[ppb/dec] | p-value | confidence |
| Europe            | 0.47 $\pm$ 0.20                  | <0.01   | very high  | 0.60 $\pm$ 0.29                  | <0.01   | very high  |
| Eur Arctic        | -0.30 $\pm$ 0.31                 | 0.06    | high       | -0.97 $\pm$ 0.46                 | <0.01   | very high  |
| Can Arctic        | -0.48 $\pm$ 0.52                 | 0.06    | high       | -0.45 $\pm$ 0.65                 | 0.16    | medium     |
| California        | 2.60 $\pm$ 0.91                  | <0.01   | high       | 2.16 $\pm$ 0.93                  | <0.01   | high       |
| W USA             | 1.13 $\pm$ 0.57                  | <0.01   | very high  | 0.83 $\pm$ 0.69                  | 0.02    | very high  |
| Pacific NW        | 0.04 $\pm$ 0.58                  | 0.88    | low        | -0.10 $\pm$ 0.74                 | 0.78    | low        |
| E N America       | 0.17 $\pm$ 0.45                  | 0.45    | low        | -0.54 $\pm$ 0.55                 | 0.05    | high       |
| SE US             | 1.17 $\pm$ 0.81                  | <0.01   | high       | 0.73 $\pm$ 1.12                  | 0.19    | low        |
| E China           | 5.10 $\pm$ 2.39                  | <0.01   | high       | 4.04 $\pm$ 3.79                  | 0.03    | high       |
| S Japan           | 1.69 $\pm$ 0.97                  | <0.01   | medium     | 1.81 $\pm$ 1.28                  | <0.01   | medium     |
| NE Asia           | 1.73 $\pm$ 0.95                  | <0.01   | high       | 0.86 $\pm$ 1.04                  | 0.10    | medium     |
| SE Asia           | 5.74 $\pm$ 1.24                  | <0.01   | medium     | 2.68 $\pm$ 2.49                  | 0.03    | medium     |
| S China Sea       | 4.75 $\pm$ 1.29                  | <0.01   | medium     | 3.79 $\pm$ 1.72                  | <0.01   | medium     |
| S Malay Peninsula | 3.36 $\pm$ 1.02                  | <0.01   | medium     | 2.99 $\pm$ 1.17                  | <0.01   | medium     |
| India             | 6.07 $\pm$ 1.41                  | <0.01   | medium     | 6.08 $\pm$ 2.28                  | <0.01   | medium     |
| Persian Gulf      | 2.25 $\pm$ 0.87                  | <0.01   | medium     | 2.11 $\pm$ 0.94                  | <0.01   | medium     |
| Gulf of Guinea    | 1.16 $\pm$ 0.71                  | <0.01   | medium     | 0.99 $\pm$ 0.80                  | 0.01    | medium     |
| Hawaii            | 0.62 $\pm$ 0.40                  | <0.01   | very high  | 0.71 $\pm$ 0.58                  | 0.01    | very high  |
| Oceania           | 0.65 $\pm$ 0.31                  | <0.01   | very high  | 0.98 $\pm$ 0.40                  | <0.01   | very high  |

**Table S3: Same as Table S2, but now for the FTOC and the post-COVID (1995-2022) and pre-COVID (1995-2019) time periods. Also note that the Hawaii and Oceania regions had to be discarded, because they only rely on ozone ozonesonde time series for the FTOC, as the FTIR and Umkehr instruments only provide the entire tropospheric ozone column TrOC. As for India, the time series of the two IAGOS sites only extend up to 2018, only 1995-2019 trends are listed here. In the text and figures, these values have been used for the 1995-2022 trends as well.**

|                   | (1)                              | (2)     | (3)        | (4)                              | (5)     | (6)        |
|-------------------|----------------------------------|---------|------------|----------------------------------|---------|------------|
|                   | 1995-2022                        |         |            | 1995-2019                        |         |            |
|                   | Trend $\pm 2\sigma$<br>[ppb/dec] | p-value | confidence | Trend $\pm 2\sigma$<br>[ppb/dec] | p-value | confidence |
| Europe            | 0.68 $\pm$ 0.23                  | <0.01   | very high  | 1.25 $\pm$ 0.27                  | <0.01   | very high  |
| Eur Arctic        | -1.00 $\pm$ 0.47                 | <0.01   | very high  | -0.18 $\pm$ 0.52                 | 0.49    | medium     |
| Can Arctic        | -1.00 $\pm$ 0.81                 | 0.01    | high       | -0.72 $\pm$ 0.86                 | 0.09    | medium     |
| California        | 1.93 $\pm$ 0.79                  | <0.01   | high       | 2.38 $\pm$ 0.97                  | <0.01   | high       |
| W USA             | 0.45 $\pm$ 0.97                  | 0.35    | low        | 0.62 $\pm$ 1.01                  | 0.22    | low        |
| Pacific NW        | 0.20 $\pm$ 0.73                  | 0.59    | low        | 0.29 $\pm$ 0.78                  | 0.46    | low        |
| E N America       | 0.17 $\pm$ 0.55                  | 0.54    | low        | 0.53 $\pm$ 0.60                  | 0.08    | medium     |
| SE US             | 1.41 $\pm$ 0.78                  | <0.01   | high       | 1.52 $\pm$ 0.91                  | <0.01   | high       |
| E China           | 1.21 $\pm$ 2.15                  | 0.26    | very low   | 1.09 $\pm$ 2.38                  | 0.36    | very low   |
| S Japan           | 1.12 $\pm$ 1.13                  | 0.05    | medium     | 1.18 $\pm$ 1.13                  | 0.04    | medium     |
| NE Asia           | 2.62 $\pm$ 0.91                  | <0.01   | medium     | 2.74 $\pm$ 0.92                  | <0.01   | medium     |
| SE Asia           | 4.91 $\pm$ 1.22                  | <0.01   | medium     | 4.88 $\pm$ 1.22                  | <0.01   | medium     |
| S China Sea       | 3.76 $\pm$ 1.20                  | <0.01   | medium     | 4.54 $\pm$ 1.34                  | <0.01   | medium     |
| S Malay Peninsula | 1.37 $\pm$ 0.91                  | <0.01   | medium     | 2.22 $\pm$ 1.10                  | <0.01   | medium     |
| India             |                                  |         |            | 4.95 $\pm$ 1.42                  | <0.01   | medium     |
| Persian Gulf      | 1.10 $\pm$ 0.85                  | 0.01    | medium     | 1.52 $\pm$ 0.95                  | <0.01   | medium     |
| Gulf of Guinea    | -0.48 $\pm$ 0.67                 | 0.16    | very low   | 0.01 $\pm$ 0.84                  | 0.99    | very low   |

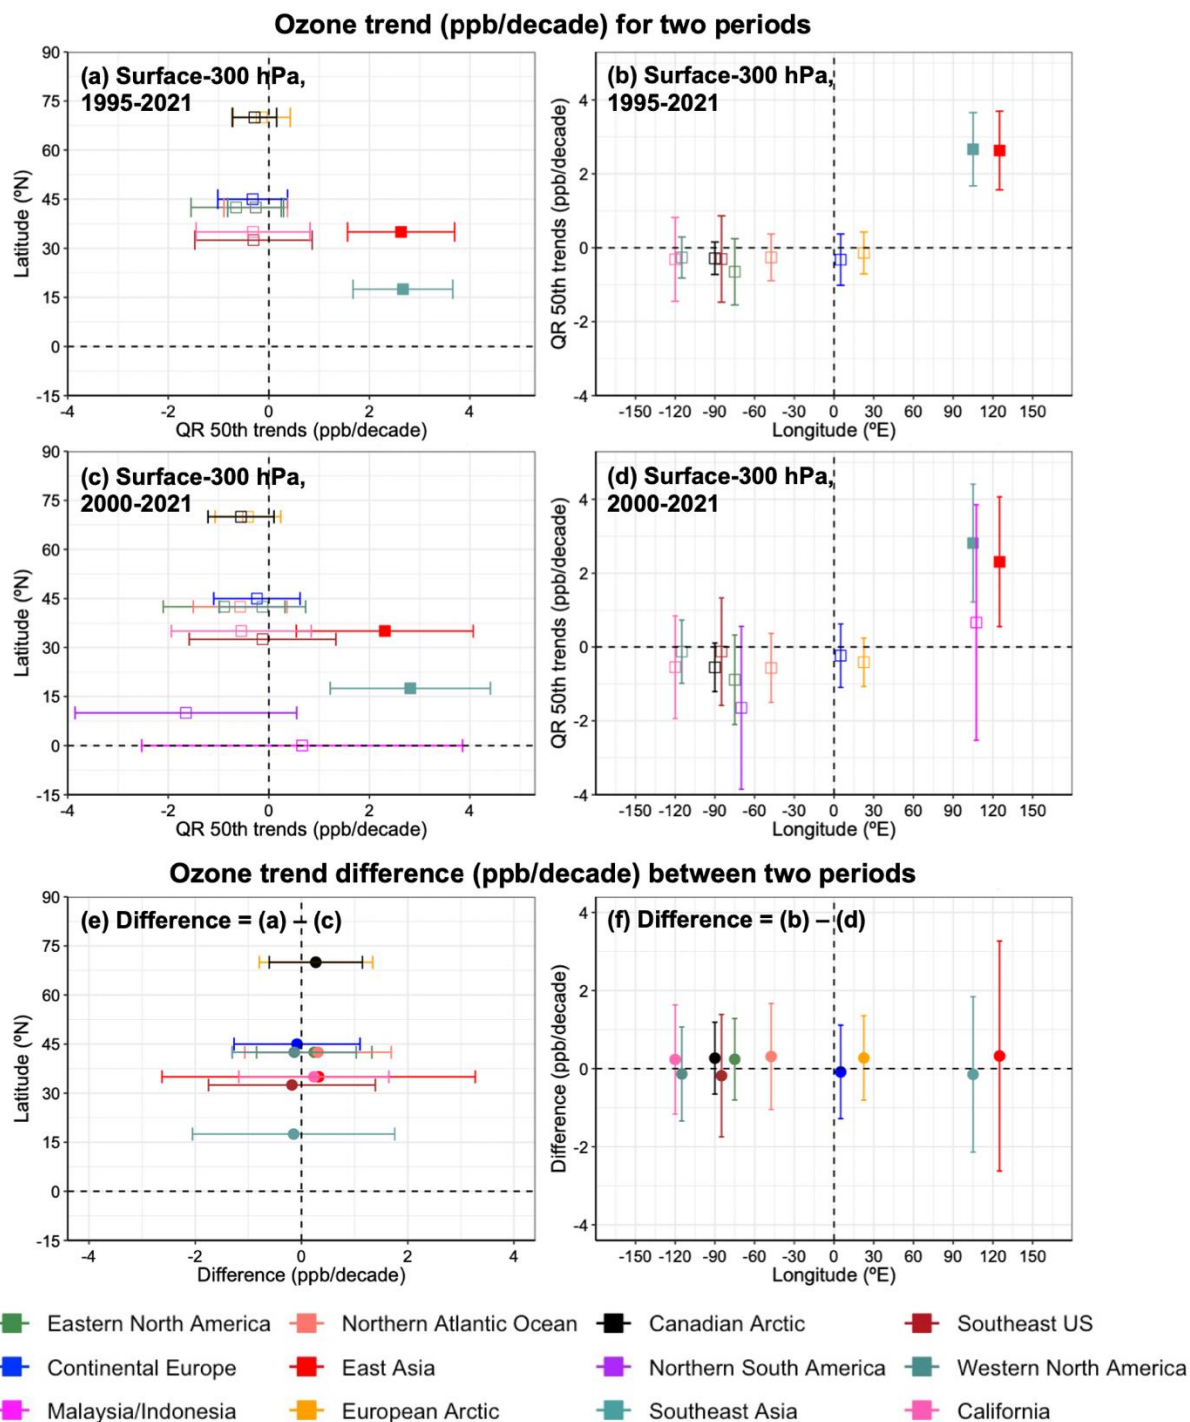

**Fig. S1:** (a, b) TOST QR Median trends (in ppb/decade) of the mean ozone mixing ratios from surface-300 hPa varying with latitude (left) and longitude (right), for the period of 1995-2021. Error bars represent the 95% confidence interval of the QR trend. Colors denote the regions. (c, d) The same as (a, b), but for the period of 2000-2021. (e, f). The difference in the QR median trend between the periods of 1995-2021 and 2000-2021. Error bars represent the 95% confidence interval for the QR median trend difference.

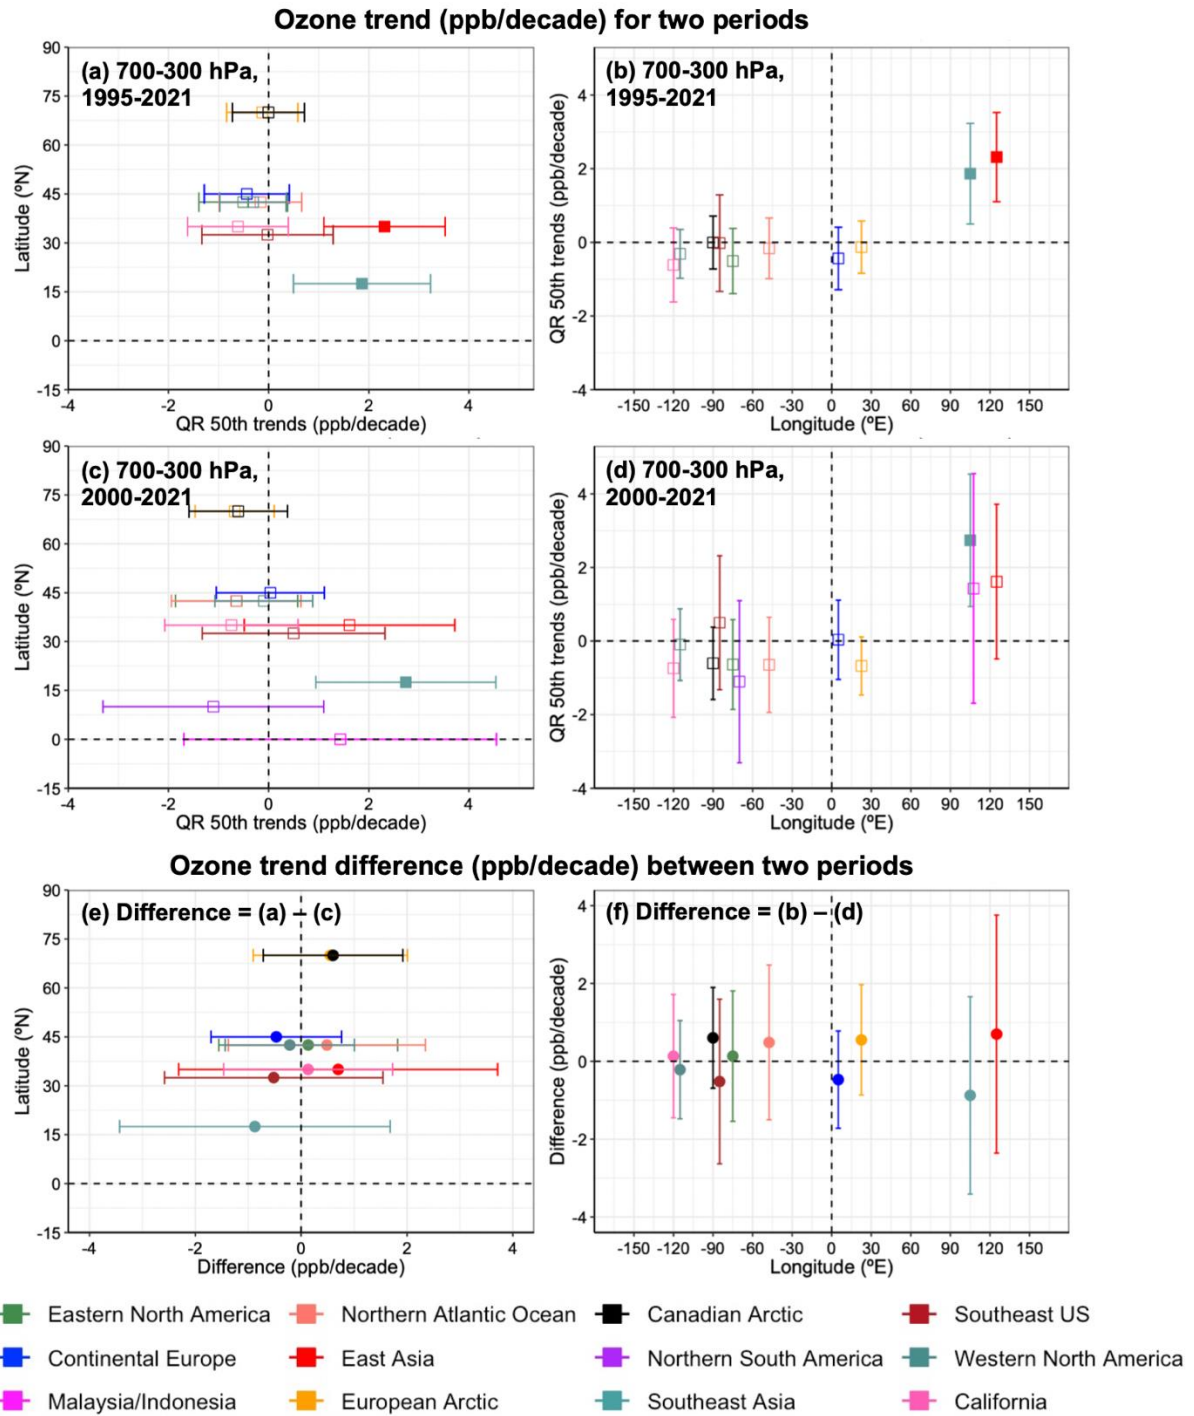

Fig. S2: The same as Fig. 7, but for the mean ozone mixing ratio over 700-300 hPa, FTOC.

### Ozone trend (ppb/decade) for Surface-700 hPa

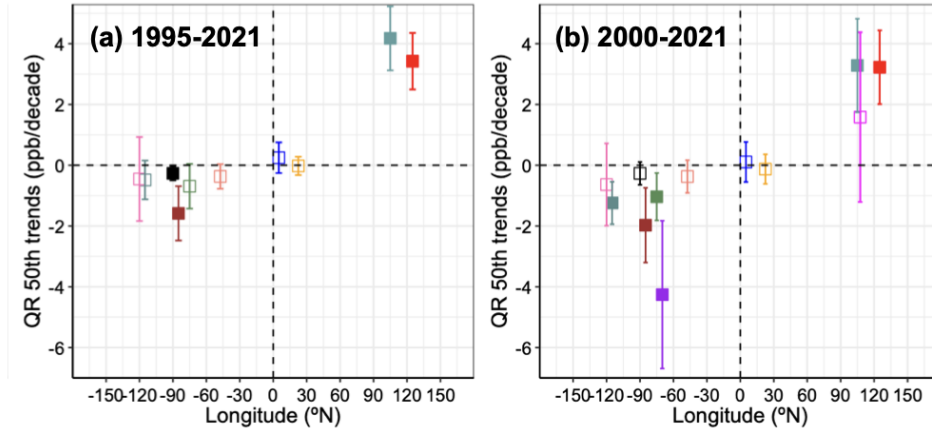

### Ozone trend at (%/decade) for Surface-700 hPa

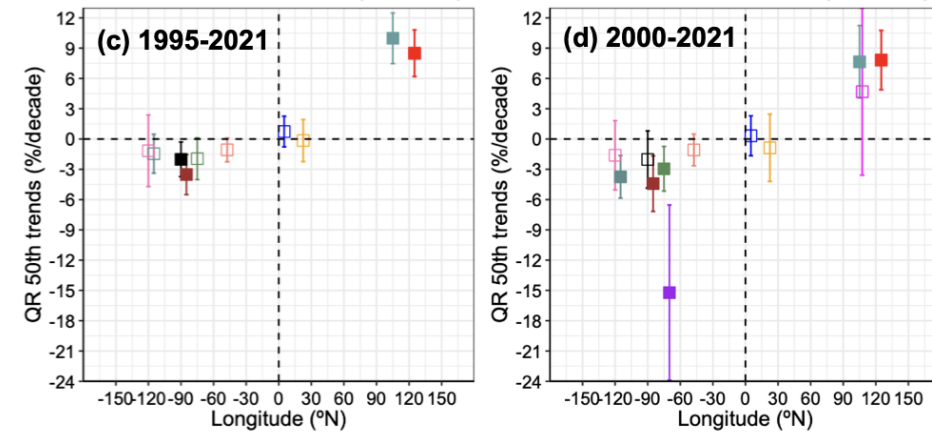

- Eastern North America    ■ Northern Atlantic Ocean    ■ Canadian Arctic    ■ Southeast US
- Continental Europe    ■ East Asia    ■ Northern South America    ■ Western North America
- Malaysia/Indonesia    ■ European Arctic    ■ Southeast Asia    ■ California

Fig. S3: (a, b). TOST QR median trends (in ppb/decade) of the mean ozone mixing ratios from surface-700 hPa (LTOC) varying with longitude, for the periods of 1995-2021 and 2000-2021. Error bars represent the 95% confidence interval for the QR trend. Colors denote the regions. (c, d). The same as (a, b), but for the relative QR median trends in %/decade.



### Ozone trends comparison (surface-300 hPa): post-COVID and pre-COVID

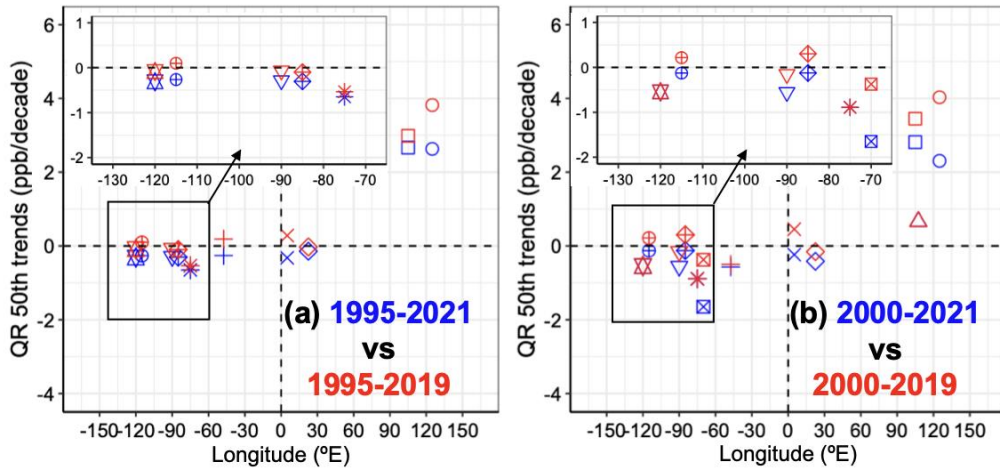

### Ozone trends difference (surface-300 hPa): post-COVID minus pre-COVID

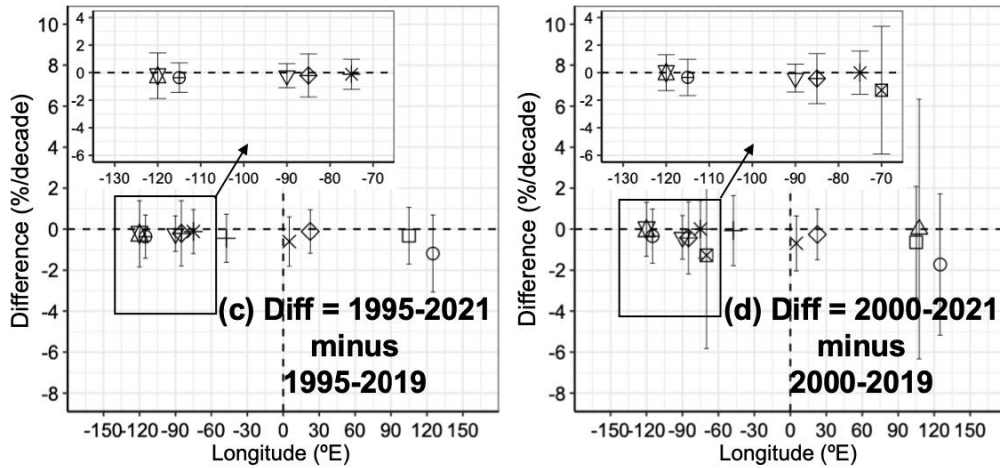

- |                         |                           |                          |                         |
|-------------------------|---------------------------|--------------------------|-------------------------|
| ✱ Eastern North America | ⊕ Northern Atlantic Ocean | ▽ Canadian Arctic        | ⊠ Southeast US          |
| ✕ Continental Europe    | ○ East Asia               | ⊞ Northern South America | ⊕ Western North America |
| △ Malaysia/Indonesia    | ◇ European Arctic         | □ Southeast Asia         | ⊞ California            |

**Fig. S4:** (a). TOST QR median absolute trends (in ppb/decade) of the mean ozone mixing ratios from surface-300 hPa varying with longitude, for the periods 1995-2021 and 1995-2019. Shapes denote the regions. (b). The same as (a), but for the periods 2000-2021 and 2000-2019. (c). QR Median trend difference between the periods 1995-2021 and 1995-2019. Error bars represent the 95% confidence interval for the QR Median trend difference. (d). The same as (c), but between the periods 2000-2021 and 2000-2019. All zoom-in windows are to show the trends in North America more clearly.

**Ozone trends (%/decade) comparison:  
post-COVID and pre-COVID of 700-300 hPa**

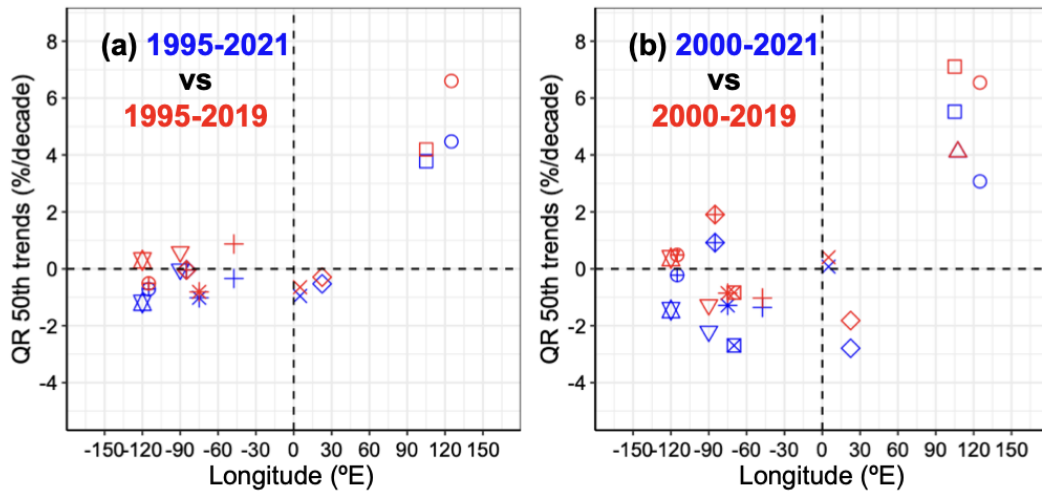

**Ozone trends difference (%/decade):  
post-COVID minus pre-COVID of 700-300 hPa**

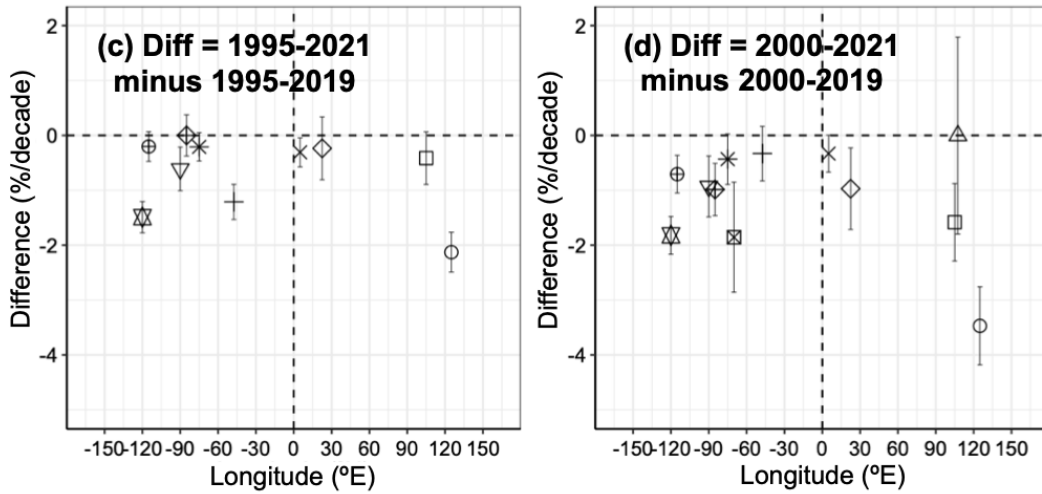

- |                         |                           |                          |                         |
|-------------------------|---------------------------|--------------------------|-------------------------|
| * Eastern North America | + Northern Atlantic Ocean | ▽ Canadian Arctic        | ⊕ Southeast US          |
| × Continental Europe    | ○ East Asia               | ⊗ Northern South America | ⊕ Western North America |
| △ Malaysia/Indonesia    | ◇ European Arctic         | □ Southeast Asia         | ⊗ California            |

**Fig. S5:** The same as Fig. 9, but now for TOST QR median relative trends (in %/decade) for the mean ozone mixing ratio from 700-300 hPa, FTOC.

### Ozone trends comparison (700-300 hPa): post-COVID and pre-COVID

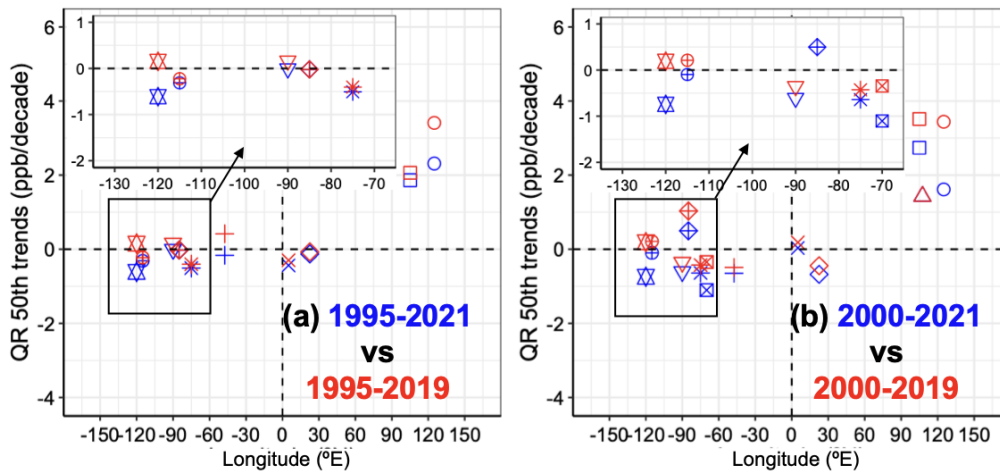

### Ozone trends difference (700-300 hPa): post-COVID minus pre-COVID

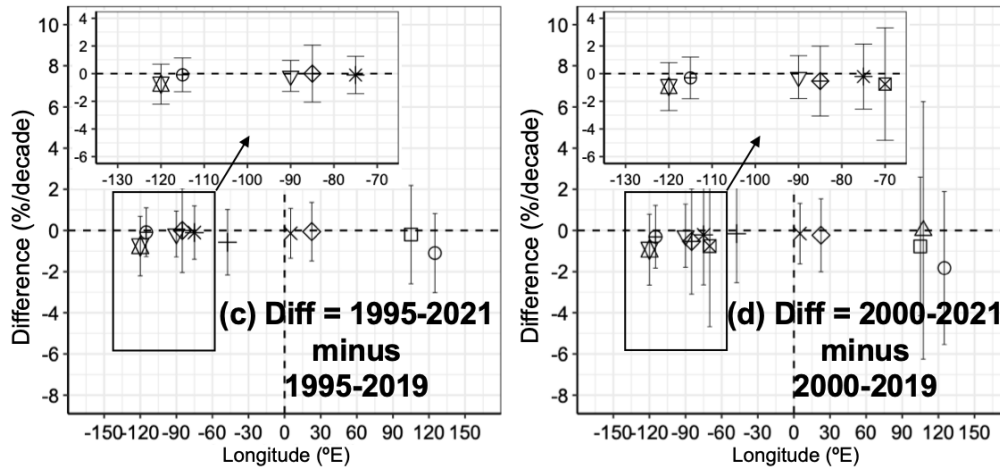

- |                         |                           |                          |                         |
|-------------------------|---------------------------|--------------------------|-------------------------|
| ✱ Eastern North America | ✚ Northern Atlantic Ocean | ▽ Canadian Arctic        | ◊ Southeast US          |
| ✕ Continental Europe    | ○ East Asia               | ⊠ Northern South America | ⊕ Western North America |
| △ Malaysia/Indonesia    | ◇ European Arctic         | □ Southeast Asia         | ⊗ California            |

Fig. S6: The same as Fig. S5, but now for TOST QR median absolute trends (in ppb/decade) for the mean ozone mixing ratio from 700-300 hPa, FTOC.

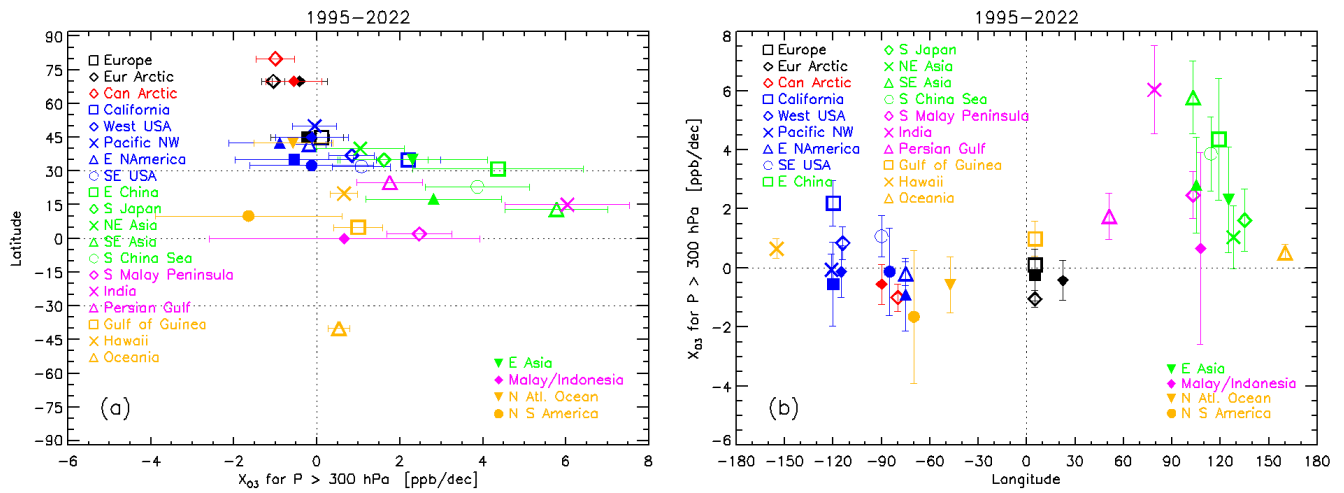

**Fig. S7:** Same as Fig 13, but now for the 1995-2021/22 period, and without including the individual site QR trend estimates, as they have been calculated only for the 2000-2022 period.

## Section S1 Example R code for deriving synthesized trends using the linear mixed-effects modelling approach

This section provides an example R code of deriving the synthesized trends, based on 9 sites in the European Arctic region. To apply this code to other regions, uncertainty values associated with different instrumental types need to be updated accordingly.

```
#####  
#European Arctic  
#####  
set.seed(2013)  
library(mgcv)  
filename=c("IAGOS_HEL_1997_1997_L1_v2.csv",  
           "IAGOS_KEF_2003_2013_L1_v2.csv",  
           "O3S_nyalesund_1992_2022_L1_v3.csv",  
           "O3S_scoresbysund_1989_2022_L1_v3.csv",  
           "O3S_sodankyla_1994_2022_L1_v3.csv",  
           "O3S_lerwick_1992_2022_L1_v3.csv",  
           "FTIR_Kiruna_1996_2022_L1_v1.csv",  
           "FTIR_Ny_Alesund_1994_2022_L1_v1.csv",  
           "FTIR_Harestua_2009_2020_L1_v1.csv")  
nm=12*(2022-1990+1)  
ny=2022-1965+1  
  
datalist=lapply(filename[1:9], function(x) read.csv(x))  
for (i in 1:length(datalist)){  
  datalist[[i]]$site=i  
  datalist[[i]]=datalist[[i]][,c("year", "month", "day", "hour", "XO3_p300", "site")]  
}  
dt = do.call("rbind", datalist)  
  
#data reformatting  
date=cbind(month=rep(seq(1,12),ny), year=rep(seq(1965,2022), each=12), ind=seq(1,12*ny))  
dt=merge(dt,date, by=c("year", "month"), all.x=T)  
time=seq(from=as.Date("1965-01-01"), to=as.Date("2022-12-31"), by=1)  
date2=cbind(year=format(time, format="%Y"), month=format(time, format="%m"), day=format(time, format="%d"),  
indd=seq(1,length(time)))  
date2=apply(date2, 2, as.numeric)  
dt=merge(dt, date2, by=c("year", "month", "day"), all.x=T)  
dt=merge(dt, enso, by=c("year", "month"), all.x=T)  
dt=dt[order(dt$indd),]  
dt[dt<=-999]=NA  
  
#the main function to derive the synthesized trends  
#note: uncertainty values are dependent on the instrumental types  
mbfun.gamm.dataunc=function(formula,data){  
  n=nrow(data)  
  b=ceiling(n^0.25)  
  nblocks=ceiling(n/b)  
  blocks=lapply(seq_len(n-b+1), function(i) seq(i, i+b-1))  
  bn=sample(1:length(blocks),nblocks,replace=T)  
  sdt=data[unlist(blocks[bn]), ]  
  sdt[sdt$site==1,"XO3_p300"]=sdt[sdt$site==1,"XO3_p300"]+rnorm(length(sdt[sdt$site==1,"XO3_p300"]), mean=0,  
sd=sdt[sdt$site==1,"XO3_p300"]*0.055)  
  sdt[sdt$site==2,"XO3_p300"]=sdt[sdt$site==2,"XO3_p300"]+rnorm(length(sdt[sdt$site==2,"XO3_p300"]), mean=0,  
sd=sdt[sdt$site==2,"XO3_p300"]*0.055)  
  sdt[sdt$site==3,"XO3_p300"]=sdt[sdt$site==3,"XO3_p300"]+rnorm(length(sdt[sdt$site==3,"XO3_p300"]), mean=0,  
sd=sdt[sdt$site==3,"XO3_p300"]*0.055)  
  sdt[sdt$site==4,"XO3_p300"]=sdt[sdt$site==4,"XO3_p300"]+rnorm(length(sdt[sdt$site==4,"XO3_p300"]), mean=0,  
sd=sdt[sdt$site==4,"XO3_p300"]*0.055)
```

```

  sdt[sdt$site==5,"XO3_p300"]=sdt[sdt$site==5,"XO3_p300"]+rnorm(length(sdt[sdt$site==5,"XO3_p300"]), mean=0,
sd=sdt[sdt$site==5,"XO3_p300"]*0.055)
  sdt[sdt$site==6,"XO3_p300"]=sdt[sdt$site==6,"XO3_p300"]+rnorm(length(sdt[sdt$site==6,"XO3_p300"]), mean=0,
sd=sdt[sdt$site==6,"XO3_p300"]*0.055)
  sdt[sdt$site==7,"XO3_p300"]=sdt[sdt$site==7,"XO3_p300"]+rnorm(length(sdt[sdt$site==7,"XO3_p300"]), mean=0,
sd=sdt[sdt$site==7,"XO3_p300"]*0.14)
  sdt[sdt$site==8,"XO3_p300"]=sdt[sdt$site==8,"XO3_p300"]+rnorm(length(sdt[sdt$site==8,"XO3_p300"]), mean=0,
sd=sdt[sdt$site==8,"XO3_p300"]*0.14)
  sdt[sdt$site==9,"XO3_p300"]=sdt[sdt$site==9,"XO3_p300"]+rnorm(length(sdt[sdt$site==9,"XO3_p300"]), mean=0,
sd=sdt[sdt$site==9,"XO3_p300"]*0.14)
  sdt=aggregate(.,~ind+site, data=sdt, FUN=function(x) { mean(x,na.rm=T)})
  tryCatch({ mod=gamm(formula, random=list(site=~1+ind), data=sdt)
  coef(mod$gam)
}, error=function(e){ })
}

```

```

start.year=pmax(min(dt$year, na.rm=T), 1990)
if (start.year<1995 & length(unique(dt$year))>15){
  pt=dt[dt$year>=1990,]
  mod=replicate(1000, mbfun.gamm.dataunc(formula=XO3_p300~ind+s(month,bs="cc",k=12)+enso,data=pt))
  if (is.list(mod)) { mod=t(do.call("rbind", mod))}
  trend=mean(mod[2,])*120
  trend.unc=sd(mod[2,])*120
  pvalue=2*pt(q=abs(trend/trend.unc), df=nrow(pt)-14, lower.tail=FALSE)
}

```
